# Supplementary material for: Band alignment and depletion zone at ZnO/CdS and ZnO/CdSe hetero-structures for temperature independent ammonia vapor sensing
Source: Royal Society of Chemistry journal article supplement (doi:10.1039/c6cp06251b), 2016-01-01

## Band alignment and depletion zone at ZnO/CdS and ZnO/CdSe hetero-structures for temperature independent ammonia vapor sensing

N. Rajeswari Yogamalar<sup>1</sup>, K. Sadhanandham<sup>2</sup>, A. Chandra Bose<sup>3</sup> and R. Jayavel<sup>2,\*</sup>

<sup>1</sup>Velammal Engineering College, Ambattur Road, Surapet, Chennai – 600 066, India

<sup>2</sup>Centre for Nanoscience and Technology, Anna University, Chennai – 600 025, India, [rjvel@annauniv.edu](mailto:rjvel@annauniv.edu)

<sup>3</sup>Nanomaterials laboratory, National Institute of Technology, Tiruchirappalli – 620 015, India

(ESI†) S1 (a) The XRD pattern and (b) SEM morphology of as-synthesized Z nanorods after ultra-sonicated for 2 h.

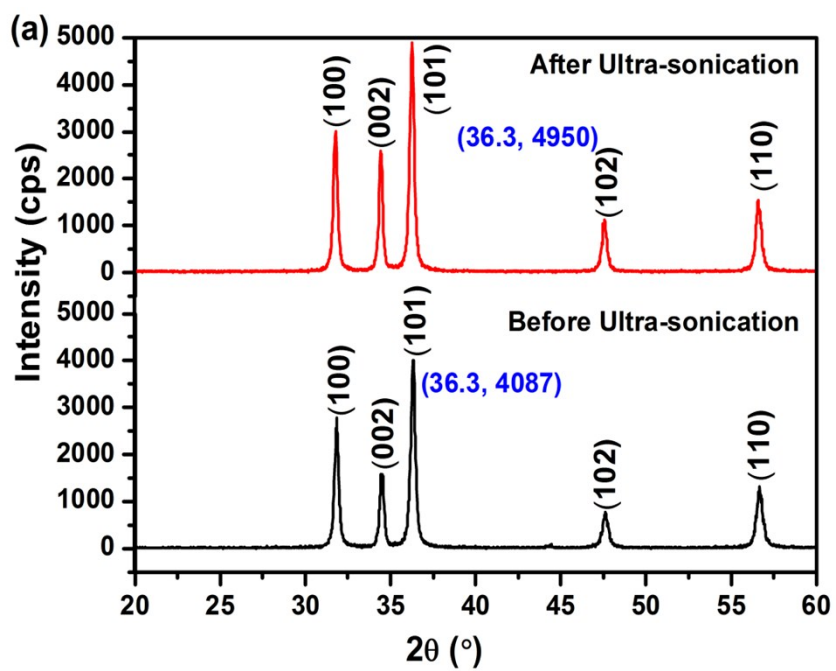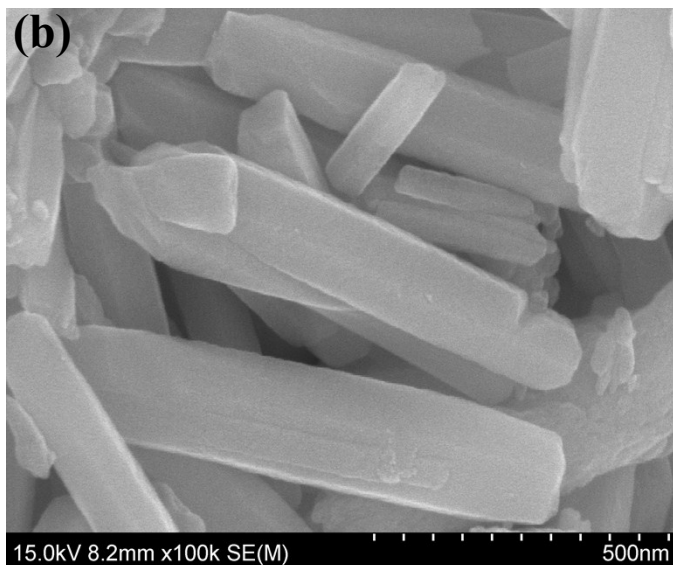

## Band alignment and depletion zone at ZnO/CdS and ZnO/CdSe hetero-structures for temperature independent ammonia vapor sensing

N. Rajeswari Yogamalar<sup>1</sup>, K. Sadhanandham<sup>2</sup>, A. Chandra Bose<sup>3</sup> and R. Jayavel<sup>2,\*</sup>

<sup>1</sup>*Velammal Engineering College, Ambattur Road, Surapet, Chennai – 600 066, India*

<sup>2</sup>*Centre for Nanoscience and Technology, Anna University, Chennai – 600 025, India, [rjvel@annauniv.edu](mailto:rjvel@annauniv.edu)*

<sup>3</sup>*Nanomaterials laboratory, National Institute of Technology, Tiruchirappalli – 620 015, India*

(ESI†) S2 The thickness variation and surface coating morphology of dip-coated ZnO nanostructures on clad removed optical fiber.

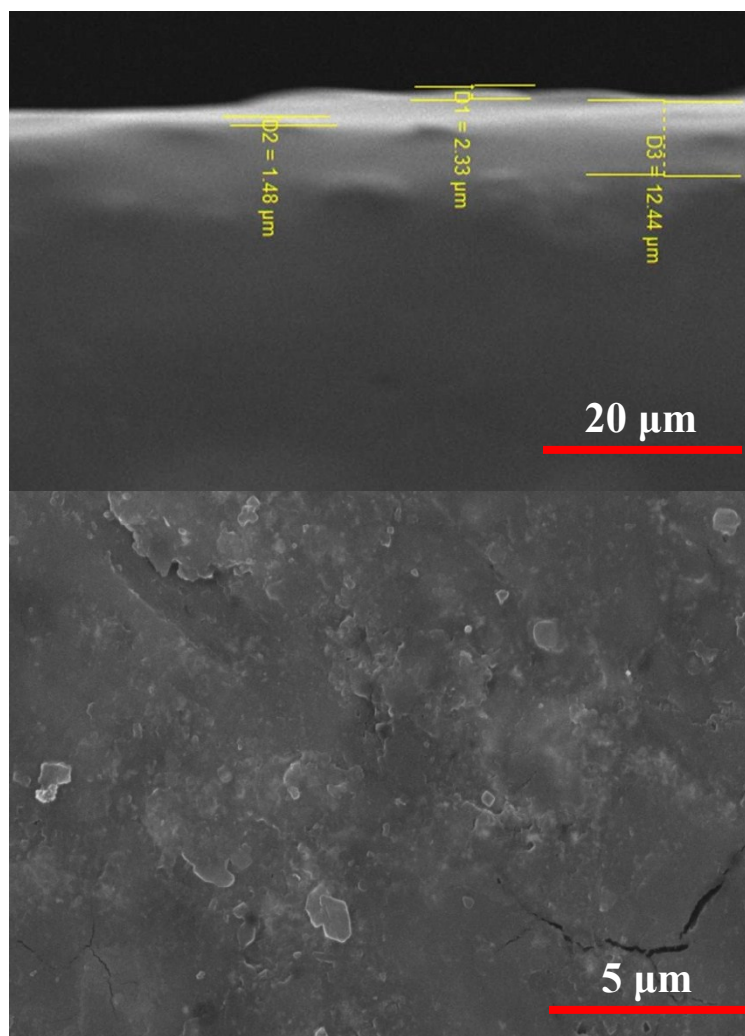

**Band alignment and depletion zone at ZnO/CdS and ZnO/CdSe hetero-structures for temperature independent ammonia vapor sensing**

**N. Rajeswari Yogamalar<sup>1</sup>, K. Sadhanandham<sup>2</sup>, A. Chandra Bose<sup>3</sup> and R. Jayavel<sup>2,\*</sup>**

<sup>1</sup>*Velammal Engineering College, Ambattur Road, Surapet, Chennai – 600 066, India*

<sup>2</sup>*Centre for Nanoscience and Technology, Anna University, Chennai – 600 025, India, [rjvel@annauniv.edu](mailto:rjvel@annauniv.edu)*

<sup>3</sup>*Nanomaterials laboratory, National Institute of Technology, Tiruchirappalli – 620 015, India*

(ESI†) S3 The EDS spectra and the elemental composition of Z nanostructures

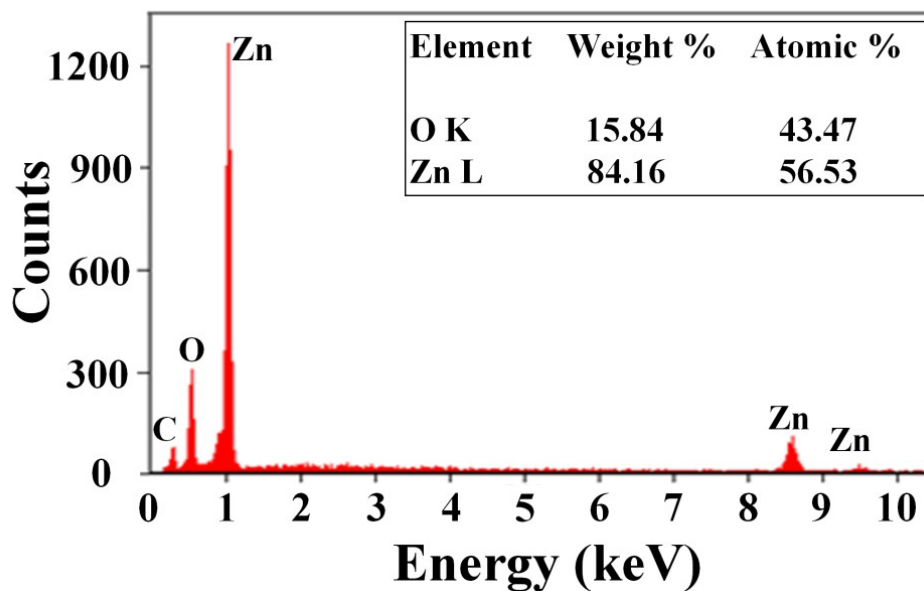

**Band alignment and depletion zone at ZnO/CdS and ZnO/CdSe hetero-structures for temperature independent ammonia vapor sensing**

**N. Rajeswari Yogamalar<sup>1</sup>, K. Sadhanandham<sup>2</sup>, A. Chandra Bose<sup>3</sup> and R. Jayavel<sup>2,\*</sup>**

<sup>1</sup>*Velammal Engineering College, Ambattur Road, Surapet, Chennai – 600 066, India*

<sup>2</sup>*Centre for Nanoscience and Technology, Anna University, Chennai – 600 025, India, [rjvel@annauniv.edu](mailto:rjvel@annauniv.edu)*

<sup>3</sup>*Nanomaterials laboratory, National Institute of Technology, Tiruchirappalli – 620 015, India*

(ESI†) S4 The EDS spectra and the elemental composition of (a) ZC1 and (b) ZC2 nanostructures

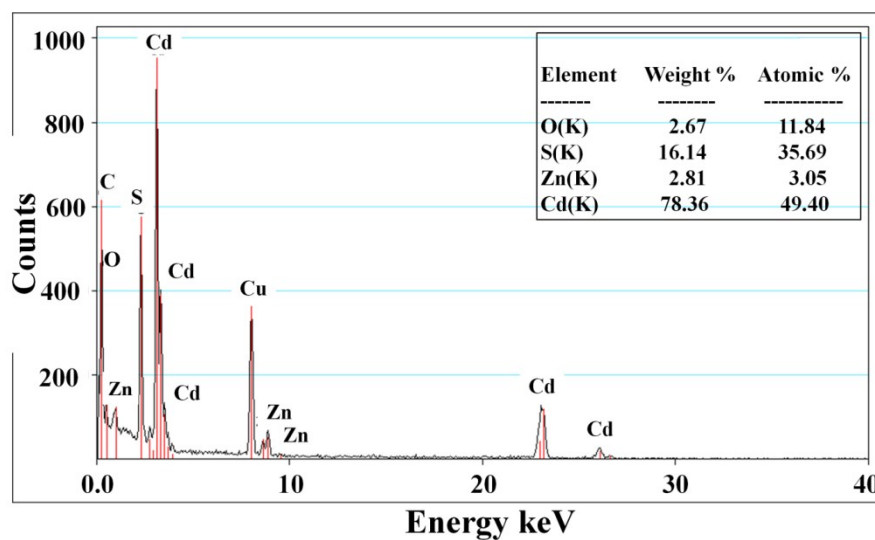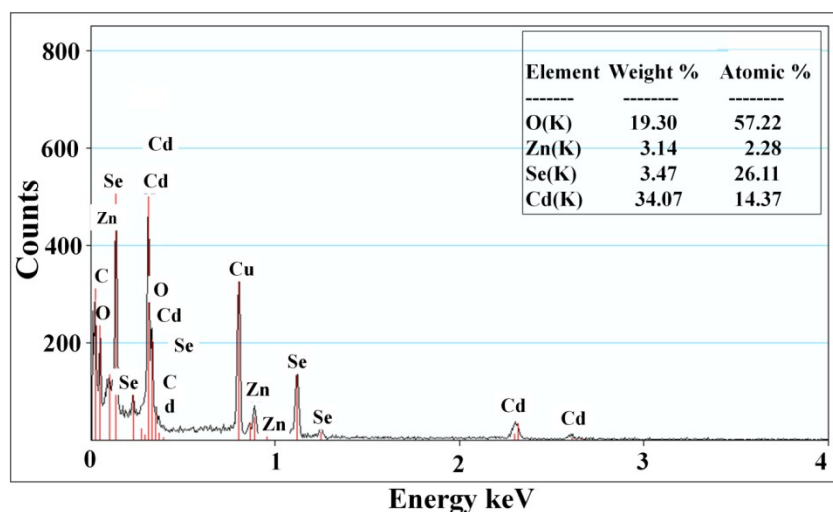

**Band alignment and depletion zone at ZnO/CdS and ZnO/CdSe hetero-structures for temperature independent ammonia vapor sensing**

**N. Rajeswari Yogamalar<sup>1</sup>, K. Sadhanandham<sup>2</sup>, A. Chandra Bose<sup>3</sup> and R. Jayavel<sup>2,\*</sup>**

<sup>1</sup>*Velammal Engineering College, Ambattur Road, Surapet, Chennai – 600 066, India*

<sup>2</sup>*Centre for Nanoscience and Technology, Anna University, Chennai – 600 025, India, [rjvel@annauniv.edu](mailto:rjvel@annauniv.edu)*

<sup>3</sup>*Nanomaterials laboratory, National Institute of Technology, Tiruchirappalli – 620 015, India*

(ESI†) S5 The FTIR spectra of pure ZnO and the surface-decorated ZnO

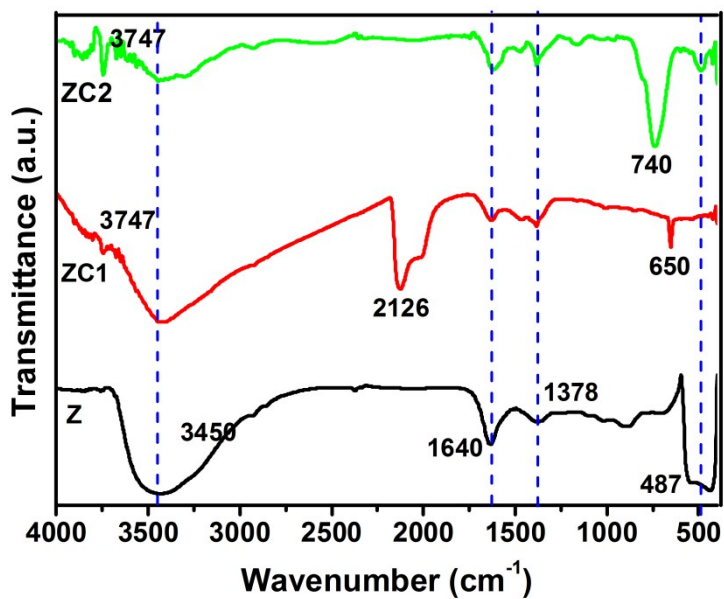

# Band alignment and depletion zone at ZnO/CdS and ZnO/CdSe hetero-structures for temperature independent ammonia vapor sensing

N. Rajeswari Yogamalar<sup>1</sup>, K. Sadhanandham<sup>2</sup>, A. Chandra Bose<sup>3</sup> and R. Jayavel<sup>2,\*</sup>

<sup>1</sup>Velammal Engineering College, Ambattur Road, Surapet, Chennai – 600 066, India

<sup>2</sup>Centre for Nanoscience and Technology, Anna University, Chennai – 600 025, India, [rjvel@annauniv.edu](mailto:rjvel@annauniv.edu)

<sup>3</sup>Nanomaterials laboratory, National Institute of Technology, Tiruchirappalli – 620 015, India

(ESI†) S6 The TGA plots of (a) C1 and C2 nanoparticles and (b) Z, ZC1 and ZC2 nanostructures

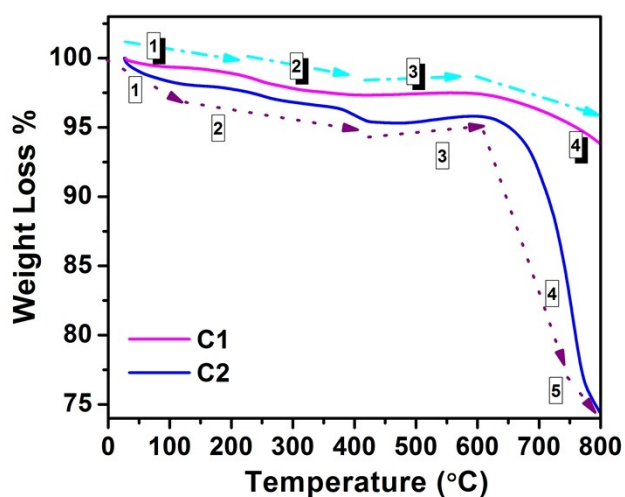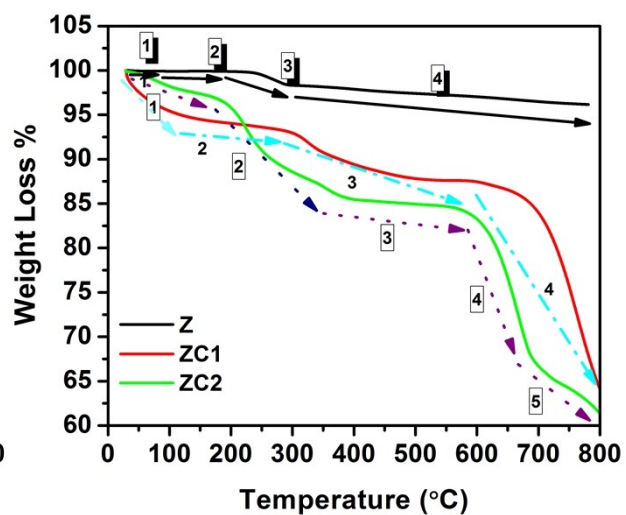

# Band alignment and depletion zone at ZnO/CdS and ZnO/CdSe hetero-structures for temperature independent ammonia vapor sensing

N. Rajeswari Yogamalar<sup>1</sup>, K. Sadhanandham<sup>2</sup>, A. Chandra Bose<sup>3</sup> and R. Jayavel<sup>2,\*</sup>

<sup>1</sup>Velammal Engineering College, Ambattur Road, Surapet, Chennai – 600 066, India

<sup>2</sup>Centre for Nanoscience and Technology, Anna University, Chennai – 600 025, India, [rjvel@annauniv.edu](mailto:rjvel@annauniv.edu)

<sup>3</sup>Nanomaterials laboratory, National Institute of Technology, Tiruchirappalli – 620 015, India

(ESI†) S7 (a) Reflectance spectra and (b) K-M function of as-prepared C1 and C2 nanoparticles

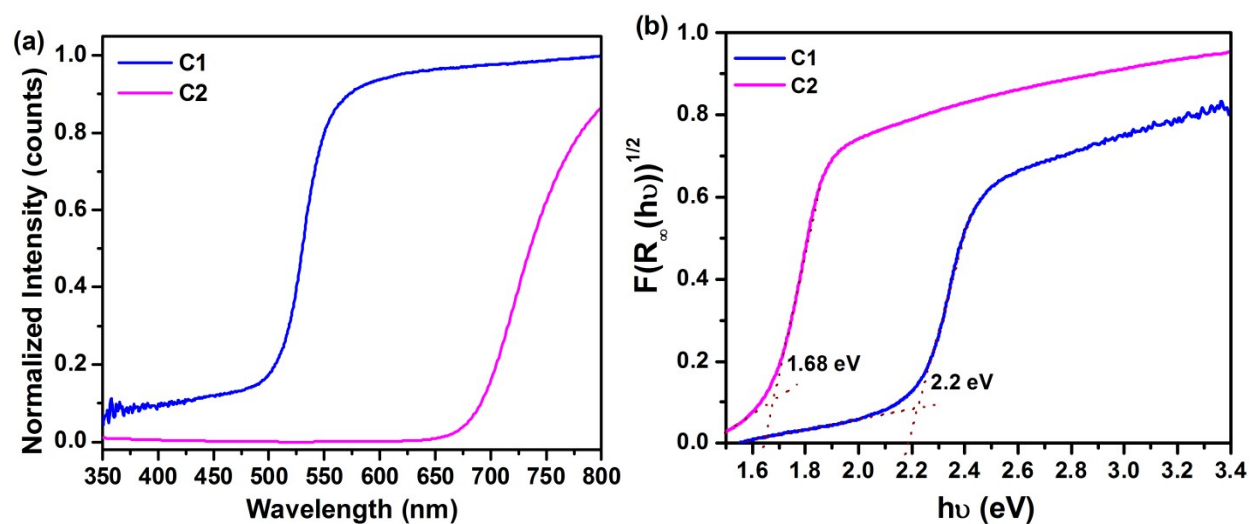



**Band alignment and depletion zone at ZnO/CdS and ZnO/CdSe hetero-structures for temperature independent ammonia vapor sensing**

**N. Rajeswari Yogamalar<sup>1</sup>, K. Sadhanandham<sup>2</sup>, A. Chandra Bose<sup>3</sup> and R. Jayavel<sup>2,\*</sup>**

<sup>1</sup>*Velammal Engineering College, Ambattur Road, Surapet, Chennai – 600 066, India*

<sup>2</sup>*Centre for Nanoscience and Technology, Anna University, Chennai – 600 025, India, [rjvel@annauniv.edu](mailto:rjvel@annauniv.edu)*

<sup>3</sup>*Nanomaterials laboratory, National Institute of Technology, Tiruchirappalli – 620 015, India*

(ESI†) S8 Ammonia vapor adsorptions plot for Z, ZC1, and ZC2 coated fiber optic sensors

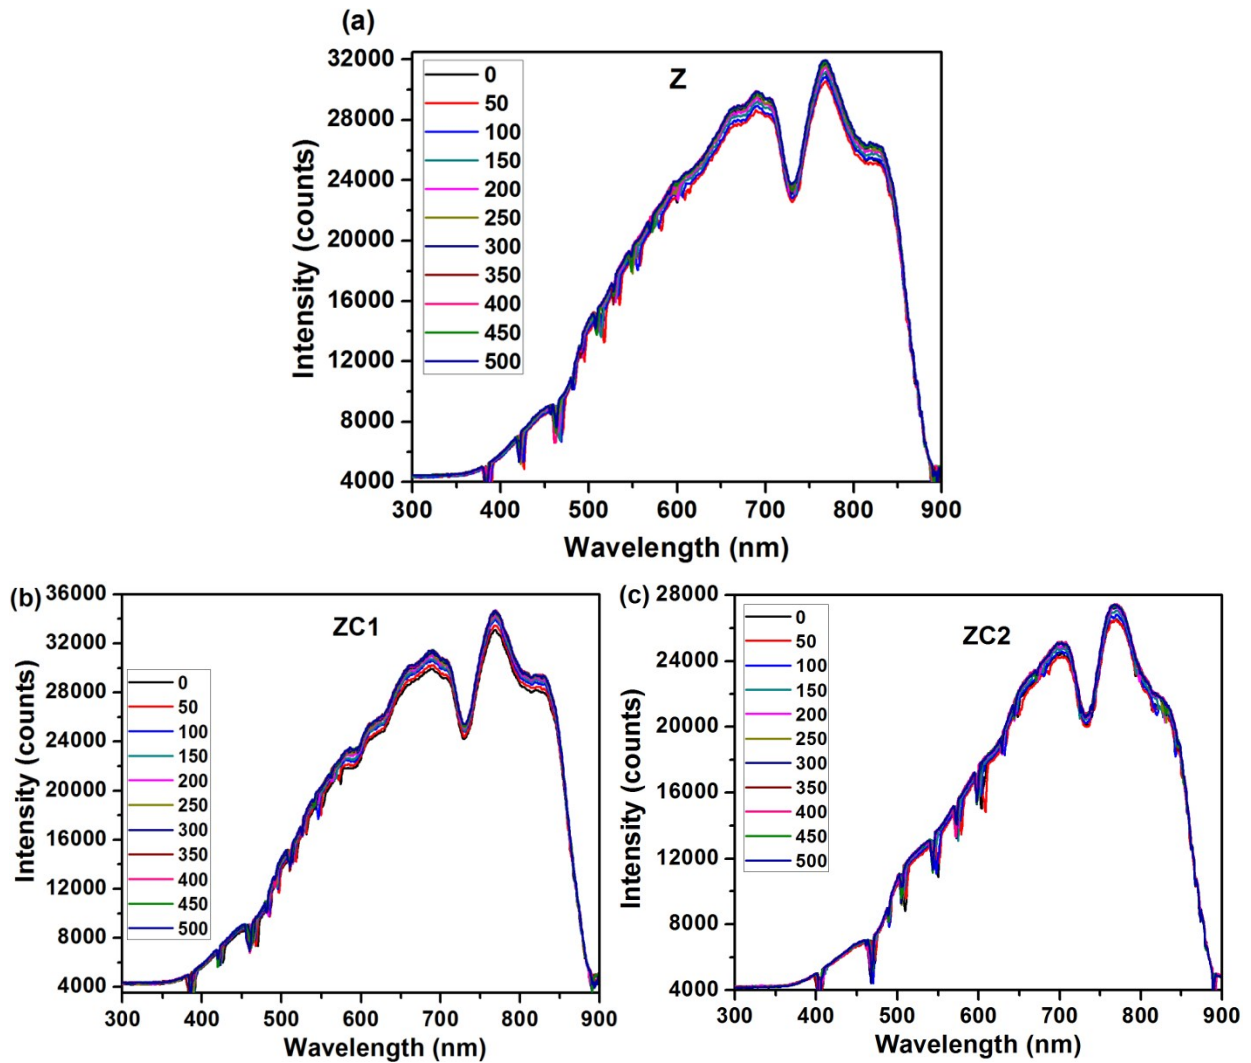



# Band alignment and depletion zone at ZnO/CdS and ZnO/CdSe hetero-structures for temperature independent ammonia vapor sensing

N. Rajeswari Yogamalar<sup>1</sup>, K. Sadhanandham<sup>2</sup>, A. Chandra Bose<sup>3</sup> and R. Jayavel<sup>2,\*</sup>

<sup>1</sup>Velammal Engineering College, Ambattur Road, Surapet, Chennai – 600 066, India

<sup>2</sup>Centre for Nanoscience and Technology, Anna University, Chennai – 600 025, India, [rjvel@annauniv.edu](mailto:rjvel@annauniv.edu)

<sup>3</sup>Nanomaterials laboratory, National Institute of Technology, Tiruchirappalli – 620 015, India

(ESI†) S9 Vapor gas selectivity and the stability of the surface-passivated ZC1 nanostructures

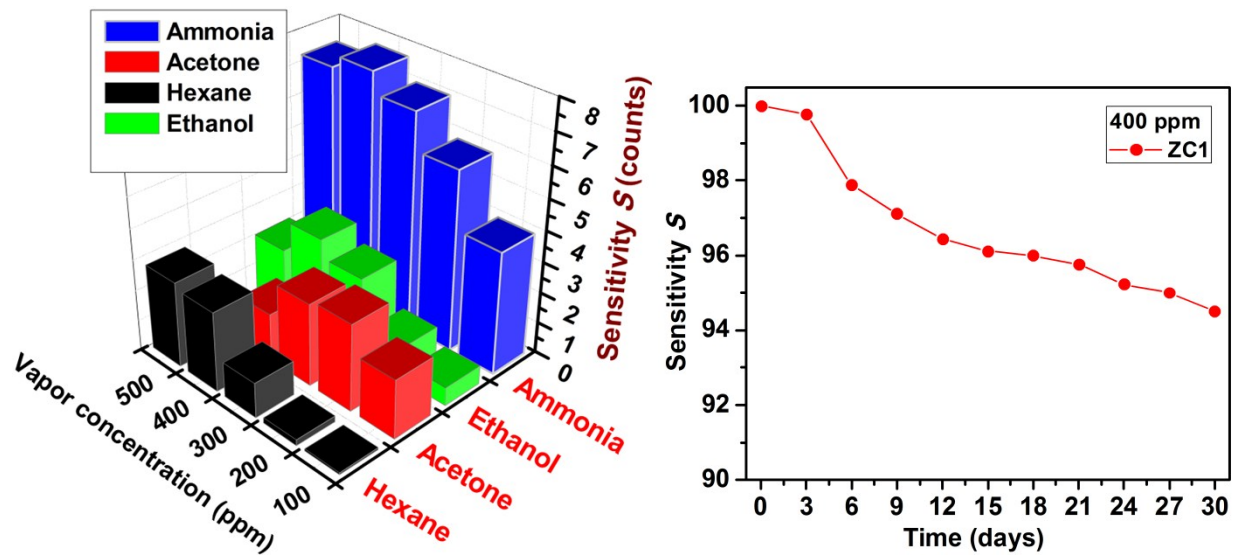

**Band alignment and depletion zone at ZnO/CdS and ZnO/CdSe hetero-structures for temperature independent ammonia vapor sensing**

**N. Rajeswari Yogamalar<sup>1</sup>, K. Sadhanandham<sup>2</sup>, A. Chandra Bose<sup>3</sup> and R. Jayavel<sup>2,\*</sup>**

<sup>1</sup>*Velammal Engineering College, Ambattur Road, Surapet, Chennai – 600 066, India*

<sup>2</sup>*Centre for Nanoscience and Technology, Anna University, Chennai – 600 025, India, [rjvel@annauniv.edu](mailto:rjvel@annauniv.edu)*

<sup>3</sup>*Nanomaterials laboratory, National Institute of Technology, Tiruchirappalli – 620 015, India*

(ESI<sup>†</sup>) S10 Core-shell like formation and the band alignment of ZnO/CdSe hetero-structure

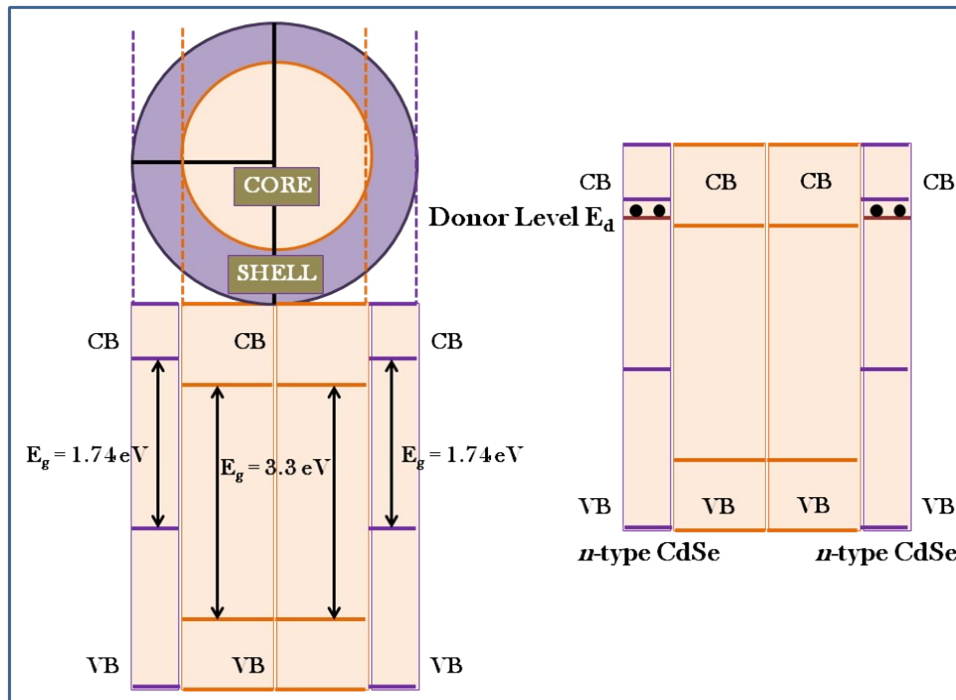

Supplement: c6cp06251b1.pdf [file c6cp06251b1.pdf]
